# Supplementary material for: Multi-omics analysis of glucose-mediated signaling by a moonlighting Gβ protein Asc1/RACK1
Source: PLoS Genet. 2021 Jul 2;17(7):e1009640. doi: 10.1371/journal.pgen.1009640 (PMC8282090; doi:10.1371/journal.pgen.1009640)
Supplement: S4 Table — (CSV) [file pgen.1009640.s019.csv]

intersect.up		intersect.dn		antag.asc1.up		antag.gpa2.up		asc1.uni.up		asc1.uni.dn		gpa2.uni.up		gpa2.uni.dn
C00047		C00049		C00020				C00008		C00065		C00031		C00025
C00064		C00430		C00041				C00026		C00740		C00095		C00455
C00077		C00655		C00051				C00054		C02218		C00109		C00979
C00085		C01157		C00099				C00062		C03406		C00124		C01118
C00092		C01165		C00120				C00074				C00137		C02291
C00103				C00127				C00082				C00159		C03175
C00135				C00144				C00106				C00184		C05382
C00148				C00242				C00123				C00221		C05938
C00275				C00253				C00153				C00232		C15522
C00329				C00262				C00166				C00256
C00446				C00362				C00212				C00267
C00636				C00380				C00250				C00392
C00668				C00387				C00294				C00492
C00669				C00437				C00314				C00577
C00931				C00449				C00327				C00721
C01094				C00475				C00328				C00794
C01097				C00559				C00330				C00984
C01172				C00575				C00360				C01013
C01177				C00643				C00361				C01161
C03546				C00942				C00407				C02336
C03862				C00956				C00417				C04294
C04006				C01077				C00459				C05404
C05345				C01233				C00601				C05577
				C02376				C00624				C06002
				C02693				C00632
				C05274				C00780
				C05512				C00860
				C05711				C01252
				C05828				C01279
				C05921				C01929
								C02505
								C02946
								C02989
								C03090
								C03227
								C03765
								C04076
								C05620
								C05647
								C05651
								C05827
								C05936
								C07086
