# Supplementary material for: Multi-omics analysis of glucose-mediated signaling by a moonlighting Gβ protein Asc1/RACK1
Source: PLoS Genet. 2021 Jul 2;17(7):e1009640. doi: 10.1371/journal.pgen.1009640 (PMC8282090; doi:10.1371/journal.pgen.1009640)
Supplement: S8 Table — (CSV) [file pgen.1009640.s023.csv]

intersect.up		intersect.dn		antag.asc1.up		antag.gpa2.up		asc1.uni.up		asc1.uni.dn		gpa2.uni.up		gpa2.uni.dn
C00020		C00111		C00085		C00025		C00047		C00329		C00055		C00051
C00144		C00118		C00092		C00031		C00082		C00956		C00074		C00184
C00242		C00334		C00103		C00095		C00153		C01077		C00117		C00256
C00362		C00430		C00262		C00109		C00279		C02843		C00199		C00328
C01005		C00655		C00275		C00124		C00327		C02989		C00231		C00380
		C00826		C00294		C00137		C00437		C05993		C00360		C00577
		C01157		C00446		C00159		C00449				C00392		C00689
		C01165		C00624		C00221		C00459				C00620		C01013
		C01252		C00636		C00232		C00534				C00794		C03838
		C02356		C00668		C00267		C00575				C00836		C05274
		C03284		C00931		C00647		C00643				C01694		C05647
				C01094		C00979		C00669				C04294		C15522
				C01097		C00984		C00780				C05108		C16688
				C01118		C01161		C00860				C15776
				C01172		C02336		C00864				C15778
				C01177		C05577		C01279				C15780
				C02946		C05938		C01929				C15782
				C03090		C06002		C03227				C15816
				C03451				C05651
				C03546				C05828
				C03862				C05936
				C04006
				C04076
				C05345
